# Supplementary material for: The effect of the experimental parameters on the growth of MoS2 flakes
Source: Royal Society of Chemistry journal article supplement (doi:10.1039/c8ce00733k), 2018-01-01
Supplement: c8ce00733k1.pdf [file c8ce00733k1.pdf]

Supporting information for

## **The effect of the experimental parameters on the growth and optical properties of MoS<sub>2</sub> crystals**

Fei Chen<sup>a,b\*</sup>, Weitao Su<sup>a</sup>

<sup>a</sup> *College of Materials and Environmental Engineering, Hangzhou Dianzi University, 310018, Hangzhou, China*

<sup>b</sup> *State Key Laboratory of Luminescent Materials and Devices, and Institute of Optical Communication Materials, South China University of Technology, Guangzhou 510641, China*

\*E-mail: feichen@hdu.edu.cn (F. Chen)

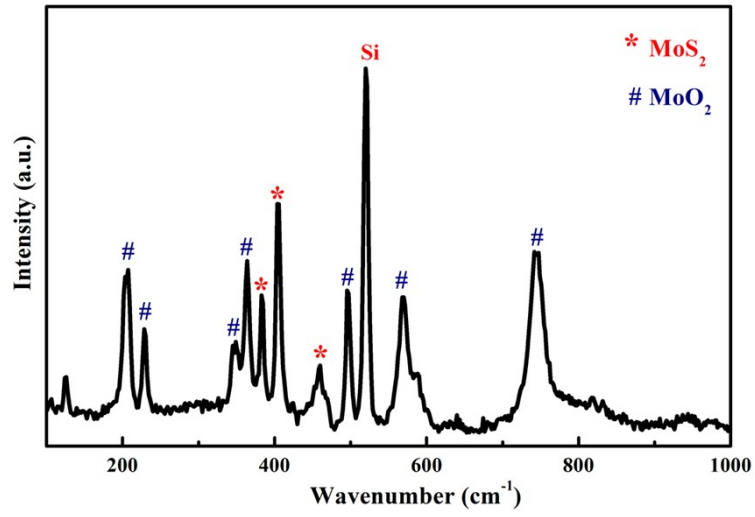

Fig. S1 Raman spectra of the microparticles in Figure 2(a) in the article.
